# Supplementary material for: Respiratory Reactance Reflects Chronic Obstructive Pulmonary Disease Burden Independent of Computed Tomography-defined Structural Changes
Source: Research Square preprint supplement (doi:10.21203/rs.3.rs-6897263/v1), 2025-06-20
Supplement: Supplementary file 1 [file 6817e0d958f2816673baf7d8.docx]

**Respiratory Reactance Reflects Chronic Obstructive Pulmonary Disease Burden Independent of CT-Defined Structural Changes**

Chien-Wen Huang1-2*, Yi-An Hsieh1, Yu-Ming Huang1, Yi-Hao Peng1, Ling-I Chen1, Fang-Chuan Dai1, Yu-Sheng Lin1, Yi-Luen Shen 1,3,4†

1Division of Chest Medicine, Department of Internal Medicine, Asia University Hospital, Taichung, Taiwan, ROC. 2Department of Medical Laboratory Science and Biotechnology, Asia University, Taichung, Taiwan.3College of Life Science, National Chung Hsing University, Taichung, Taiwan. 4Ph.D. Program in Translational Medicine, National Chung Hsing University, Taichung, Taiwan.

Supplementary 1: Logistic Regression Model to Predict FEV₁%pred < 50%

| Model | Coefficient  (β) | Standard Error (S.E.) | Wald χ² | Odds Ratio  (Exp (β)) | *P*-value |
| --- | --- | --- | --- | --- | --- |
| Model 1: R5-R20 | | | | | |
| R5-R20 | 14.87 | 2.69 | 30.57 |  | <0.001 |
| Intercept | -2.20 | 0.42 | 27.61 | 0.111 | <0.001 |
| Model 2: AX | | | | | |
| AX | 1.34 | 0.23 | 33.53 | 3.81(2.42-6.00) | <0.001 |
| Intercept | -2.10 | 0.38 | 33.24 | 0.122 | <0.001 |
| Model 3: R5-R20 +AX | | | | | |
| R5-R20 | -6.11 | 6.83 | 0.80 | 0.00 (0.00-1435.75) | 0.371 |
| AX | 1.79 | 0.57 | 9.87 | 6.00 (1.96-18.35) | 0.002 |
| Intercept | -1.92 | 0.42 | 20.70 | 0.147 | <0.001 |
| Model 4: R5-R20 + AX+ Emphysema | | | | | |
| R5-R20 | -5.40 | 6.94 | 0.61 | 0.01 (0.00-3654.32) | 0.437 |
| AX | 1.76 | 0.58 | 9.14 | 5.80 (1.86-18.10) | 0.003 |
| CLE |  |  | 7.14 |  | 0.068 |
| No vs. Severe | -1.06 | 0.51 | 4.26 | 0.35 (0.13-0.95) | 0.039 |
| Mild vs. Severe | -1.57 | 0.67 | 5.57 | 0.21 (0.06-0.77) | 0.018 |
| Moderate vs. Severe | -1.24 | 0.62 | 3.91 | 0.29 (0.08-0.99) | 0.048 |
| Intercept | -1.04 | 0.53 | 3.83 | 0.35 | 0.050 |

Four logistic regression models were constructed to predict FEV₁ <50% predicted: (1) R5–R20 alone, (2) AX alone, (3) R5–R20 combined with AX, and (4) R5–R20 and AX combined with CT-assessed emphysema severity.

Abbreviations: AX: area under the reactance curve; CLE: centrilobular emphysema; FEV1pred: predicted percentage of forced expiratory volume in one second; R5–R20, difference between resistance at 5 Hz and 20 Hz.

Supplementary table 2. Baseline characteristics comparisons between high AX (AX > 1.5 kPa·L-1)and low AX (AX< 1.5 kPa·L-1) group

| Characteristics | n | AX ≤1.5  (n=89) | n | AX >1.5  (n=69) | *P*-value |
| --- | --- | --- | --- | --- | --- |
| Age, year (SD) | 89 | 68.3 (8.5) | 69 | 69.5 (8.1) | 0.358 |
| BMI, kg/m2, (SD) | 89 | 23.9 (3.7) | 69 | 23.4 (4.1) | 0.389 |
| Male gender, n (%) | 89 | 88 (98.9) | 69 | 65 (94.2) | 0.168* |
| FVC, L (SD) | 89 | 2.61 (0.61) | 69 | 1.88 (0.49) | <0.001 |
| FVCpred, % (SD) | 89 | 77.0 (15.3) | 69 | 59.4 (12.2) | <0.001 |
| FEV1, L (SD) | 89 | 1.65 (0.49) | 69 | 0.98 (0.38) | <0.001 |
| FEV1pred, % (SD) | 89 | 62.8 (16.6) | 69 | 40.1 (13.3) | <0.001 |
| Ratio, % (SD) | 89 | 62.5 (9.0) | 69 | 51.5 (10.4) | <0.001 |
| GOLD spirometry stage, n (%) | 89 |  | 69 |  | <0.001 |
| I |  | 12 (13.5) |  | 0 (0.0) |  |
| II |  | 58 (65.2) |  | 16 (23.2) |  |
| III |  | 16 (18.0) |  | 37 (53.6) |  |
| IV |  | 3 (3.4) |  | 16 (23.2) |  |
| MMEF | 89 | 30.7 (12.7) | 69 | 16.3 (7.8) | <0.001 |
| RV/TLC | 89 | 60.1 (10.0) | 69 | 72.3 (9.6) | <0.001 |
| R5pred, % (SD) | 89 | 133.4 (24.6) | 69 | 183.0 (39.0) | <0.001 |
| R20pred, % (SD) | 89 | 121.3 (22.2) | 69 | 128.4 (29.3) | 0.087 |
| R5-R20, kPa·L-1·s-1 (SD) | 89 | 0.09 (0.05) | 69 | 0.23 (0.07) | <0.001 |
| X5, kPa·L-1·s-1 (SD) | 89 | -0.15 (0.05) | 69 | -0.36 (0.14) | <0.001 |
| AX, kPa·L-1 (SD) | 89 | 0.77 (0.40) | 69 | 2.82 (1.10) | <0.001 |
| Fres, s (SD) | 89 | 16.8 (3.6) | 69 | 23.7 (3.6) | <0.001 |
| Baseline CAT, score (SD) | 74 | 12.3 (5.7) | 59 | 14.3 (4.2) | 0.031 |
| Follow-up CAT, score (SD) | 68 | 11.2 (4.5) | 54 | 14.6 (6.1) | 0.001 |
| Baseline mMRC, n (%) | 74 |  | 59 |  | 0.602 |
| 0-1 |  | 57 (77.0) |  | 30 (50.8) |  |
| ≥ 2 |  | 17 (23.0) |  | 29 (49.2) |  |
| Follow-up mMRC, n (%) | 68 |  | 54 |  | 0.005* |
| 0-1 |  | 50 (73.5) |  | 24 (44.4) |  |
| ≥ 2 |  | 18 (26.5) |  | 30 (55.6) |  |
| Baseline COPD medication, n (%) | 89 |  | 69 |  | 0.001* |
| No |  | 17 (19.1) |  | 8 (11.6) |  |
| LABA or LAMA |  | 11 (12.4) |  | 0 (0.0) |  |
| ICS/LABA |  | 1 (1.1) |  | 0 (0.0) |  |
| LABA/LAMA |  | 41 (46.1) |  | 31 (44.9) |  |
| LABA/LAMA/ICS |  | 19 (21.3) |  | 30 (43.5) |  |
| Emphysema, n (%) | 89 |  | 69 |  | 0.495 |
| No |  | 39 (43.8) |  | 25 (36.2) |  |
| Mild |  | 17 (19.1) |  | 10 (14.5) |  |
| Moderate |  | 15 (16.9) |  | 15 (21.7) |  |
| Severe |  | 18 (20.2) |  | 19 (27.5) |  |
| Baseline exacerbation, time/year (SD) | 89 | 0.2 (0.4) | 69 | 0.1 (0.4) | 0.029 |
| Follow-up Exacerbation, time/year (SD) | 89 | 0.5 (1.1) | 69 | 0.4 (1.1) | 0.049 |

Continuous variables were presented as mean ± standard deviation (SD) and categorical variables were summarized as frequencies and percentages. Group comparisons between those who had higher AX at baseline comparing to those had lower AX were performed using the Student’s *t*-test for continuous variables and the chi-square test or Fisher’s exact test for categorical variables, as appropriate. A two-sided *p*-value of less than 0.05 was considered statistically significant.

*Fisher’s exact test

Abbreviations: AX: area under the reactance curve; CAT: chronic obstructive pulmonary disease assessment test; COPD: chronic obstructive pulmonary disease; CLE: centrilobular emphysema; FEV1: forced expiratory volume in one second; Fres: frequency of resonance; FVC: forced vital capacity; GOLD spirometric stage: classification by Global Initiative of chronic obstructive pulmonary disease; ICS: inhaled corticosteroid; LABA: long-acting beta-agonist; LAMA: long-active muscarinic antagonist; MMEFpred: predicted percentage of maximal mid-expiratory flow rate; mMRC: modified medical research council dyspnea scale; R5pred: predicted percentage of resistance at 5 Hz; R20pred: predicted percentage of resistance at 20 Hz; R5–R20, difference between resistance at 5 Hz and 20 Hz; X5: reactance at 5 Hz.
